# Supplementary material
Source: Research Square preprint supplement (doi:10.21203/rs.3.rs-8949106/v1)
Supplement: Supplementary file 1 [file 484d6ecd6ff7d29b36d5f908.docx]

Systematic Review Protocol: Anticancer Performance of Porous Drug‑Delivery Systems in Colon Cancer In Vitro Models

Registration

This protocol has been prospectively filed in PROSPERO with the registration number CRD420251108499, dated 20 July 2025. Any further revisions will be documented in the PROSPERO registry.

1. Rationale / Background

Colon cancer remains a major global health burden with high mortality rates. Despite advances in chemotherapy, treatment efficacy is limited by insufficient drug targeting, systemic toxicity, and poor intratumoral penetration. Porous drug‑delivery systems (DDSs) have emerged as promising candidates due to their tunable pore size, morphology, and surface chemistry which influence drug‑loading capacity, release behavior, and cellular uptake.

Although numerous in vitro studies have evaluated porous DDSs—including microporous (<2 nm), mesoporous (2–50 nm), and macroporous (>50 nm)—there is no systematic synthesis that compares anticancer performance based on pore type. Existing reviews focus on material families rather than IUPAC‑based porosity classification, leaving a gap in understanding structure–activity relationships across pore regimes. This systematic review aims to address this gap and provide a pore‑type–centric analysis of IC50, viability, and cytotoxicity profiles.

2. Objectives

To systematically evaluate how pore type and porous morphology influence the anticancer performance (IC50, viability, and cytotoxicity) of porous drug‑delivery systems tested in in vitro colon cancer models.

3. PICOS Framework

3.1. Population:

In vitro models of colon cancer cells were assessed for cytotoxicity or anticancer efficacy.

3.2. Intervention:

Porous drug delivery systems (DDSs) featuring micro-, meso-, or macroporous structures, where the pore type was either explicitly stated or could be deduced from the morphological data presented in the article (e.g., pore size details, structural characterization, or descriptive morphological observations).

3.3. Comparator:

The comparator could be either an unmedicated control, an inert carrier/drug delivery system, or alternative porous substances.

3.4. Outcomes:

Principal outcomes: IC50 values and cellular viability.

Secondary outcomes: Properties linked to surface characteristics, pore size and type, and additional morphology-dependent descriptors documented in the included research.

3.5. Study design:

The research methodology involved conducting original in vitro experimental investigations.

4. Eligibility Criteria

4.1. Inclusion Criteria

The eligibility criteria includes conducting initial in vitro investigations on colon cancer models.

The use of porous drug delivery systems, whether micro-, meso-, or macroporous, is a requirement.

The study ensures the accessibility of IC50 values or extractable dose-response data.

The article contains adequate morphology-related information to categorize pore type, including pore-size statistics, structural properties, and descriptive morphological reporting.

4.2. Exclusion Criteria

The study excludes research that uses colon cancer models.

There should be no assessment of cytotoxicity or cell viability.

Impermeable systems.

The literature includes reviews, patents, books, conference abstracts, and secondary research.

Absence of extractable IC50 or inadequate morphology-related data

5. Search Strategy

This systematic review was performed in compliance with PRISMA 2020 principles. A comprehensive search was performed across three electronic databases—Scopus, Web of Science Core Collection, and Google Scholar—to ensure extensive coverage of materials science, chemistry, nanotechnology, and biomedical literature relevant to porous drug-delivery systems for colon cancer.

The search for Scopus and Web of Science was confined to papers from 2015 to 2025, corresponding to the era when modern porous structures and contemporary drug-delivery techniques gained prominence. In Google Scholar, which indexes a broader and less organized array of sources, the search parameters were confined to 2019–2025 to minimize irrelevant results from non-curated entries while maintaining adequate sensitivity for recent advancements.

A three-block Boolean framework was employed, utilizing language pertinent to porous materials, anticancer drug delivery, and colorectal cancers, while omitting non-original research. The fundamental Boolean query was

("hydrogel" OR "magnetic hydrogel" OR "MOF" OR "COF" OR "ZIP" OR "porous structure*" OR "pore size" OR "mesoporous silica" OR "mesoporous carbon" OR "mesoporous" OR "macroporous" OR "nanoporous" OR "zeolite" OR "diatom" OR "HAP" OR "ceramic*" OR "MSN") AND ("drug delivery" OR "anticancer drug*") AND ("colon cancer") NOT ("review" OR "thesis" OR "book" OR "patent")

Database-specific modifications were implemented as necessary, encompassing field tags, truncation protocols, and filters for dates or document types. The comprehensive search strings for Scopus, Web of Science, and Google Scholar, along with all implemented filters, are included in the Supporting Information to guarantee perfect repeatability. The date of the last search and the deduplication process are also recorded.

The selection of studies is depicted in a PRISMA 2020 flow diagram, including the quantity of retrieved records, duplicates eliminated, titles and abstracts evaluated, full texts reviewed, reasons for exclusion, and the final collection of studies incorporated in the qualitative synthesis.

6. Study Selection

Two impartial evaluators assessed the titles and abstracts of all obtained records to ascertain possible eligibility. The complete texts of the chosen publications were thereafter examined independently to verify inclusion based on the established criteria. Discrepancies between the two reviewers' decisions were addressed through discussion and, as required, by consulting a third senior reviewer. The inter-reviewer agreement in the screening phase was measured using Cohen’s kappa coefficient to guarantee methodological reliability.

7. Data Extraction

The data extraction occurred in two phases.

In Stage 1, information pertaining to materials—including material classification, pore category, pore morphology, and structural descriptors—was extracted. Poor categorization was estimated by two reviewers based on structural or characterization data where pore size was not explicitly stated, with consensus achieved through debate.

IC₅₀ values were obtained in Stage 2. Numerical IC₅₀ values were recorded directly from the investigations. In instances where the IC₅₀ was not numerically specified, the dose–response curve (illustrating cell viability against concentration) was digitized utilizing WebPlotDigitizer (v4.6) to ascertain the IC₅₀ value. An Excel file specifically for IC₅₀ extraction recorded the extraction methodology (direct, converted, or digitized), unit-standardization procedures, and method-specific annotations. Every submission was designated a quality flag to guarantee traceability and consistency among experiments.

8. Risk of Bias Assessment

The risk of bias for the included in vitro cytotoxicity studies was evaluated using a structured checklist derived from recognized quality frameworks for laboratory research, incorporating elements from QUIN, SciRAP, and NIH criteria for in-vitro methodology.. The modified assessment tool consisted of six methodological domains:

Assay validity: suitability of the cytotoxicity or viability assay, accurate readout conditions, and application of validated techniques.

Ensure transparency: provide clarity and comprehensiveness in the reporting of biological/technical replicates and sample size.

Assessment of control adequacy: characterization and suitability of negative and positive controls employed in cytotoxicity assays.

Integrity of dose–response: clarity, completeness, and internal consistency of the dose–response assessment.

Outcome reporting for IC₅₀ refers to the reliability of the inhibitory concentration values that are presented.
This reliability is usually classified into three levels.
IC₅₀ values fall into the lowest concern tier when they are reported directly in common units, such as µM or µg/mL.

Reporting results in these established units is widely practiced, which contributes to their overall credibility.

IC₅₀ was reported with non-standard, incomplete, or inconsistent units necessitating unit conversion: assessed as unclear concern (1) due to conversion-related ambiguity.

IC₅₀ is not quantitatively stated and is derived from dose–response curves via WebPlotDigitizer (v4.6) : categorized as high concern (0) due to variability dependent on digitization.

Outcome completeness: the presence of numerical data, the ability to derive curves, and the uniformity among text, figures, and supplementary resources.

Each domain was scored using a three-level scale (2 = low concern, 1 = unclear, 0 = high concern), yielding an overall quality score ranging from 0 to 12 for each study. Following laboratory-quality evaluation practices, studies were classified as:

0–4 = high risk of bias,

5–8 = unclear risk,

9–12 = low risk.

Two reviewers conducted all risk of bias evaluations independently. In studies necessitating digitization, both reviewers separately extracted IC₅₀ values from dose–response plots via WebPlotDigitizer, and disagreements were reconciled through discussion to reduce extraction-related errors. Inter-reviewer agreement was assessed using Cohen’s kappa, with kappa values and domain-level scoring summaries provided in the Supporting Information.

9. Statistical Analysis

IC₅₀ values were descriptively summarized within each pore size category utilizing measures of central tendency and dispersion, including median, interquartile range, range, standard deviation, and coefficient of variation.To mitigate skewness and stabilize variance across studies, IC₅₀ values were transformed via the Box-Cox procedure prior to inferential analysis.

Due to significant clinical and methodological heterogeneity among trials, no quantitative meta-analysis (no aggregated effect size) was conducted.A two-way analysis of variance (ANOVA) was employed on Box–Cox–transformed IC₅₀ values to evaluate the primary impacts of cell line and pore-size category, together with their interaction (Cell × Pore Type). Statistical significance was established at p < 0.05. Polynomial curve fitting was utilized solely as a descriptive instrument and was not employed for formal hypothesis testing.

All statistical analyses (Box–Cox transformation, two-way ANOVA, post-hoc tests) and machine-learning models (Linear Regression, Random Forest, XGBoost , SVR, Gaussian Process, MLP, UMAP, t-SNE, Kernel PCA , SOM, and GMM) were implemented in Python (v3.10).

10. Protocol Amendments

Any modification to eligibility, search strategy, outcomes, or extraction procedures will be documented in PROSPERO with justification.

11. Author Contributions

All authors contribute to study design, screening, extraction, and interpretation.

12. Conflict of Interest

No conflicts of interest declared.

13. Data Availability

Extracted data will be available upon request from the corresponding author.
